# Supplementary material
Source: Research Square preprint supplement (doi:10.21203/rs.3.rs-9863772/v1)

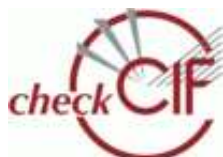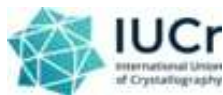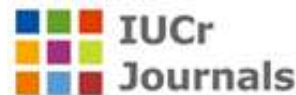

## checkCIF/PLATON report

Structure factors have been supplied for datablock(s) UPC-114

THIS REPORT IS FOR GUIDANCE ONLY. IF USED AS PART OF A REVIEW PROCEDURE FOR PUBLICATION, IT SHOULD NOT REPLACE THE EXPERTISE OF AN EXPERIENCED CRYSTALLOGRAPHIC REFEREE.

No syntax errors found.      CIF dictionary      Interpreting this report

### Datablock: UPC-114

---

|                        |                                        |                         |                           |
|------------------------|----------------------------------------|-------------------------|---------------------------|
| Bond precision:        | C-C = 0.0072 Å                         | Wavelength=0.71073      |                           |
| Cell:                  | a=40.980 (6)<br>alpha=90               | b=40.980 (6)<br>beta=90 | c=57.955 (12)<br>gamma=90 |
| Temperature:           | 293 K                                  |                         |                           |
|                        | Calculated                             | Reported                |                           |
| Volume                 | 97327 (35)                             | 97328 (34)              |                           |
| Space group            | I 4/m m m                              | I 4/m m m               |                           |
| Hall group             | -I 4 2                                 | -I 4 2                  |                           |
| Moiety formula         | C337 H214 Cu24 N12 O114 [+<br>solvent] | ?                       |                           |
| Sum formula            | C337 H214 Cu24 N12 O114 [+<br>solvent] | C337 H214 Cu24 N12 O114 |                           |
| Mr                     | 7780.41                                | 7780.15                 |                           |
| Dx, g cm <sup>-3</sup> | 0.531                                  | 0.530                   |                           |
| Z                      | 4                                      | 4                       |                           |
| Mu (mm <sup>-1</sup> ) | 0.544                                  | 0.544                   |                           |
| F000                   | 15712.0                                | 15656.0                 |                           |
| F000'                  | 15749.81                               |                         |                           |
| h, k, lmax             | 47, 47, 67                             | 47, 47, 67              |                           |
| Nref                   | 21360                                  | 21286                   |                           |
| Tmin, Tmax             | 0.849, 0.887                           | 0.854, 0.890            |                           |
| Tmin'                  | 0.849                                  |                         |                           |



|                   |                                         |                                  |                               |         |       |
|-------------------|-----------------------------------------|----------------------------------|-------------------------------|---------|-------|
| PLAT241_ALERT_2_C | High                                    | MainResAtom                      | Ueq as Compared to Neighbours | C25     | Check |
| PLAT241_ALERT_2_C | High                                    | MainResAtom                      | Ueq as Compared to Neighbours | C28     | Check |
| PLAT241_ALERT_2_C | High                                    | MainResAtom                      | Ueq as Compared to Neighbours | C36     | Check |
| PLAT241_ALERT_2_C | High                                    | MainResAtom                      | Ueq as Compared to Neighbours | C39     | Check |
| PLAT242_ALERT_2_C | Low                                     | MainResAtom                      | Ueq as Compared to Neighbours | Cu2     | Check |
| PLAT242_ALERT_2_C | Low                                     | MainResAtom                      | Ueq as Compared to Neighbours | Cu3     | Check |
| PLAT242_ALERT_2_C | Low                                     | MainResAtom                      | Ueq as Compared to Neighbours | Cu4     | Check |
| PLAT242_ALERT_2_C | Low                                     | MainResAtom                      | Ueq as Compared to Neighbours | Cu6     | Check |
| PLAT242_ALERT_2_C | Low                                     | MainResAtom                      | Ueq as Compared to Neighbours | Cu7     | Check |
| PLAT242_ALERT_2_C | Low                                     | MainResAtom                      | Ueq as Compared to Neighbours | C12     | Check |
| PLAT242_ALERT_2_C | Low                                     | MainResAtom                      | Ueq as Compared to Neighbours | C18     | Check |
| PLAT242_ALERT_2_C | Low                                     | MainResAtom                      | Ueq as Compared to Neighbours | C26     | Check |
| PLAT242_ALERT_2_C | Low                                     | MainResAtom                      | Ueq as Compared to Neighbours | C27     | Check |
| PLAT242_ALERT_2_C | Low                                     | MainResAtom                      | Ueq as Compared to Neighbours | C33     | Check |
| PLAT242_ALERT_2_C | Low                                     | MainResAtom                      | Ueq as Compared to Neighbours | C37     | Check |
| PLAT242_ALERT_2_C | Low                                     | MainResAtom                      | Ueq as Compared to Neighbours | C40     | Check |
| PLAT242_ALERT_2_C | Low                                     | MainResAtom                      | Ueq as Compared to Neighbours | C44     | Check |
| PLAT260_ALERT_2_C | Large                                   | Average Ueq of Residue Including | Cu1                           | 0.158   | Check |
| PLAT313_ALERT_2_C | Oxygen with Three Covalent Bonds (rare) | .....                            |                               | 017     | Check |
| PLAT334_ALERT_2_C | Small <C-C> Benzene Dist.               | C10 -C15                         | .                             | 1.37    | Ang.  |
| PLAT341_ALERT_3_C | Low Bond Precision on C-C Bonds         | .....                            |                               | 0.00716 | Ang.  |
| PLAT369_ALERT_2_C | Long C(sp2)-C(sp2) Bond                 | C9 - C10                         | .                             | 1.53    | Ang.  |
| PLAT369_ALERT_2_C | Long C(sp2)-C(sp2) Bond                 | C20 - C27                        | .                             | 1.53    | Ang.  |
| PLAT420_ALERT_2_C | D-H Bond Without Acceptor               | N1 --H1A                         | .                             | Please  | Check |

**Author Response: Isolated coordinated water molecule without H bond acceptor.**

|                   |                           |          |   |        |       |
|-------------------|---------------------------|----------|---|--------|-------|
| PLAT420_ALERT_2_C | D-H Bond Without Acceptor | N1 --H1B | . | Please | Check |
|-------------------|---------------------------|----------|---|--------|-------|

**Author Response: Isolated coordinated water molecule without H bond acceptor.**

|                   |                           |          |   |        |       |
|-------------------|---------------------------|----------|---|--------|-------|
| PLAT420_ALERT_2_C | D-H Bond Without Acceptor | N2 --H2A | . | Please | Check |
|-------------------|---------------------------|----------|---|--------|-------|

**Author Response: Isolated coordinated water molecule without H bond acceptor.**

|                   |                           |          |   |        |       |
|-------------------|---------------------------|----------|---|--------|-------|
| PLAT420_ALERT_2_C | D-H Bond Without Acceptor | N2 --H2B | . | Please | Check |
|-------------------|---------------------------|----------|---|--------|-------|

**Author Response: Isolated coordinated water molecule without H bond acceptor.**

|                   |                                                    |       |  |       |        |
|-------------------|----------------------------------------------------|-------|--|-------|--------|
| PLAT906_ALERT_3_C | Large K Value in the Analysis of Variance          | ..... |  | 4.311 | Check  |
| PLAT911_ALERT_3_C | Missing FCF Refl Between Thmin & STh/L=            | 0.581 |  | 89    | Report |
|                   | 1 1 0, 0 2 0, 2 2 0, 4 4 0, 6 6 0, 0 10 0,         |       |  |       |        |
|                   | 12 12 0, 15 15 0, 19 21 0, 3 6 1, 7 14 1, 12 33 1, |       |  |       |        |
|                   | 0 0 2, 0 2 2, 4 6 2, 11 25 2, 6 36 2, 0 5 3,       |       |  |       |        |
|                   | 1 6 3, 2 2 4, 3 3 4, 2 6 4, 3 12 5, 17 19 6,       |       |  |       |        |
|                   | 3 21 6, 10 24 6, 0 0 8, 9 9 8, 5 21 8, 3 29 8,     |       |  |       |        |
|                   | ( 59 More NOT listed: see .ckf listing file)       |       |  |       |        |

---

**Alert level G**

|                   |                                                  |    |      |
|-------------------|--------------------------------------------------|----|------|
| PLAT002_ALERT_2_G | Number of Distance or Angle Restraints on AtSite | 22 | Note |
|-------------------|--------------------------------------------------|----|------|

|                   |                                                      |        |        |
|-------------------|------------------------------------------------------|--------|--------|
| PLAT003_ALERT_2_G | Number of Uiso or U(i,j) Restrained non-H-Atoms      | 30     | Report |
| PLAT004_ALERT_5_G | Polymeric Structure Found with Maximum Dimension     | 3      | Info   |
| PLAT007_ALERT_5_G | Number of Unrefined Donor-H Atoms .....              | 12     | Report |
|                   | H1A H1B H2A H2B H13 H14 H15 H16                      |        |        |
|                   | H18 H17 H19A H19B                                    |        |        |
| PLAT014_ALERT_1_G | N.O.K. _shelx_fab_checksum Found in CIF .....        | Please | Check  |
| PLAT066_ALERT_1_G | Predicted and Reported Tmin&Tmax Range Identical     | ?      | Check  |
| PLAT083_ALERT_2_G | SHELXL Second Parameter in WGH T Unusually Large     | 196.96 | Why ?  |
| PLAT172_ALERT_4_G | The CIF-Embedded .res File Contains DFIX Records     | 3      | Report |
| PLAT174_ALERT_4_G | The CIF-Embedded .res File Contains FLAT Records     | 2      | Report |
| PLAT176_ALERT_4_G | The CIF-Embedded .res File Contains SADI Records     | 1      | Report |
| PLAT178_ALERT_4_G | The CIF-Embedded .res File Contains SIMU Records     | 1      | Report |
| PLAT186_ALERT_4_G | The CIF-Embedded .res File Contains ISOR Records     | 1      | Report |
| PLAT188_ALERT_3_G | A Non-default SIMU Restraint Value has been used     | 0.0100 | Report |
| PLAT188_ALERT_3_G | A Non-default SIMU Restraint Value has been used     | 0.0150 | Report |
| PLAT199_ALERT_1_G | Reported _cell_measurement_temperature ..... (K)     | 293    | Check  |
| PLAT200_ALERT_1_G | Reported _diffrn_ambient_temperature ..... (K)       | 293    | Check  |
| PLAT299_ALERT_4_G | Atom Site Occupancy Constrained at .....             | 0.5    | Check  |
|                   | H2A H2B H15 H16 H18                                  |        |        |
| PLAT299_ALERT_4_G | Atom Site Occupancy Constrained at .....             | 0.25   | Check  |
|                   | O19 C45 H17 H19A H19B H45                            |        |        |
| PLAT301_ALERT_3_G | Main Residue Disorder .....(Resd 1)                  | 1%     | Note   |
| PLAT335_ALERT_2_G | Check Large C6 Ring C-C Range C10 -C15               | 0.15   | Ang.   |
| PLAT432_ALERT_2_G | Short Inter X...Y Contact N2 ..C38 .                 | 2.98   | Ang.   |
|                   | 1/2+y, 1/2-x, 1/2-z =                                | 26_555 | Check  |
| PLAT606_ALERT_4_G | Solvent Accessible VOID(S) in Crystal Structure      | !      | Info   |
| PLAT779_ALERT_4_G | Suspect or Irrelevant (Bond) Angle(s) in CIF ...     | 7.60   | Deg.   |
|                   | C45 -O17 -C45 1_555 1_555 4_655 .....                | # 158  | Check  |
| PLAT779_ALERT_4_G | Suspect or Irrelevant (Bond) Angle(s) in CIF ...     | 7.60   | Deg.   |
|                   | C45 -O17 -C45 20_555 1_555 17_655 .....              | # 161  | Check  |
| PLAT779_ALERT_4_G | Suspect or Irrelevant (Bond) Angle(s) in CIF ...     | 28.80  | Deg.   |
|                   | C45 -O17 -H17 20_555 1_555 1_555 .....               | # 168  | Check  |
| PLAT779_ALERT_4_G | Suspect or Irrelevant (Bond) Angle(s) in CIF ...     | 28.80  | Deg.   |
|                   | C45 -O17 -H17 17_655 1_555 1_555 .....               | # 170  | Check  |
| PLAT779_ALERT_4_G | Suspect or Irrelevant (Bond) Angle(s) in CIF ...     | 28.80  | Deg.   |
|                   | C45 -O17 -H17 1_555 1_555 3_555 .....                | # 172  | Check  |
| PLAT779_ALERT_4_G | Suspect or Irrelevant (Bond) Angle(s) in CIF ...     | 28.80  | Deg.   |
|                   | C45 -O17 -H17 4_655 1_555 3_555 .....                | # 174  | Check  |
| PLAT779_ALERT_4_G | Suspect or Irrelevant (Bond) Angle(s) in CIF ...     | 23.90  | Deg.   |
|                   | O17 -C45 -H17 17_655 1_555 17_655 .....              | # 337  | Check  |
| PLAT779_ALERT_4_G | Suspect or Irrelevant (Bond) Angle(s) in CIF ...     | 23.90  | Deg.   |
|                   | O17 -C45 -H17 1_555 1_555 3_555 .....                | # 340  | Check  |
| PLAT779_ALERT_4_G | Suspect or Irrelevant (Bond) Angle(s) in CIF ...     | 25.10  | Deg.   |
|                   | H45 -C45 -H45 1_555 1_555 4_655 .....                | # 347  | Check  |
| PLAT789_ALERT_4_G | Atoms with Negative _atom_site_disorder_group #      | 3      | Check  |
| PLAT822_ALERT_4_G | CIF-embedded .res Contains Negative PART Numbers     | 1      | Check  |
| PLAT860_ALERT_3_G | Number of Least-Squares Restraints .....             | 444    | Note   |
| PLAT869_ALERT_4_G | ALERTS Related to the Use of SQUEEZE Suppressed      | !      | Info   |
| PLAT883_ALERT_1_G | Absent Datum for _atom_sites_solution_primary ..     | Please | Do !   |
| PLAT909_ALERT_3_G | Percentage of I>2sig(I) Data at Theta(Max) Still     | 35%    | Note   |
| PLAT933_ALERT_2_G | Number of HKL-OMIT Records in Embedded .res File     | 50     | Note   |
|                   | 4 9 9, 6 7 9, 5 21 8, 3 29 8, 6 13 27, 6 7 19,       |        |        |
|                   | 5 8 9, 3 18 13, 4 13 13, 1 1 0, 9 9 12, 9 27 12,     |        |        |
|                   | 7 7 16, 11 13 16, 2 6 4, 6 6 22, 4 6 2, 2 2 0,       |        |        |
|                   | 3 6 1, 2 11 11, 6 7 29, 6 36 2, 12 33 1, 10 24 6,    |        |        |
|                   | 9 12 21, 5 18 15, 2 13 23, 3 12 5, 1 13 12, 7 20 23, |        |        |
|                   | 11 20 19, 8 18 10, 16 16 12, 0 0 2, 6 11 17, 2 9 9,  |        |        |

```
4 26 12, 14 14 16, 3 21 6, 11 14 23, 2 2 4, 18 25 13,  
1 6 3, 17 19 6, 11 25 2, 7 14 1, 19 21 0, 6 7 21,  
4 14 22, 7 9 14,  
PLAT961_ALERT_5_G Dataset Contains no Negative Intensities ..... Please Check  
PLAT965_ALERT_2_G The SHELXL WEIGHT Optimisation has not Converged Please Check  
PLAT967_ALERT_5_G Note: Two-Theta Cutoff Value in Embedded .res .. 50.0 Degree  
PLAT969_ALERT_5_G The 'Henn et al.' R-Factor-gap value ..... 6.459 Note  
Predicted wR2: Based on SigI**2 4.18 or SHELX Weight 24.70  
PLAT978_ALERT_2_G Number C-C Bonds with Positive Residual Density. 0 Info  
PLAT994_ALERT_1_G SHELXL .ins Contains no or MERG 0 Instruction .. ! Note
```

---

0 **ALERT level A** = Most likely a serious problem - resolve or explain  
5 **ALERT level B** = A potentially serious problem, consider carefully  
37 **ALERT level C** = Check. Ensure it is not caused by an omission or oversight  
44 **ALERT level G** = General information/check it is not something unexpected

6 ALERT type 1 CIF construction/syntax error, inconsistent or missing data  
45 ALERT type 2 Indicator that the structure model may be wrong or deficient  
10 ALERT type 3 Indicator that the structure quality may be low  
20 ALERT type 4 Improvement, methodology, query or suggestion  
5 ALERT type 5 Informative message, check

---

It is advisable to attempt to resolve as many as possible of the alerts in all categories. Often the minor alerts point to easily fixed oversights, errors and omissions in your CIF or refinement strategy, so attention to these fine details can be worthwhile. It is up to the individual to critically assess their own results and, if necessary, seek expert advice.

---

**PLATON version of 15/01/2026; check.def file version of 02/01/2026**

---

## **duplicate check**

**No duplication found**

---

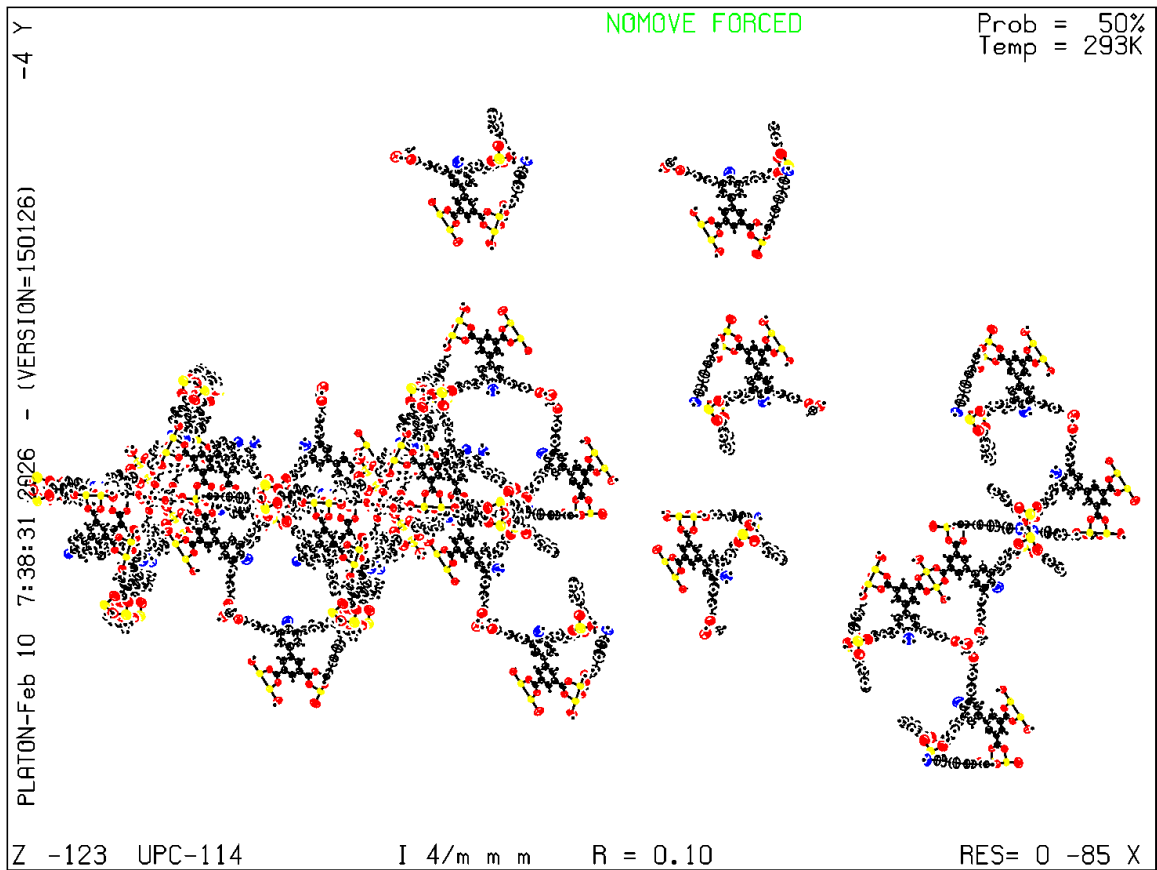

Supplement: Supplementary file 1 [file 3c2f292d716a66d43be294da.pdf]
